# Supplementary material for: Thermal stability and self-reduction of a new red phosphor NaMg(PO3)3:Mn2+
Source: Royal Society of Chemistry journal article supplement (doi:10.1039/d2ce00147k), 2022-01-01
Supplement: d2ce00147k1.pdf [file d2ce00147k1.pdf]

## Electronic Supplementary Information

### Thermal stability and self-reduction of a new red phosphor

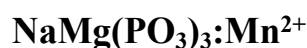

Shuang-Yin Zhu <sup>a</sup>, Dan Zhao <sup>a,b,\*</sup>, Shao-Jie Dai <sup>a</sup>, Rui-Juan Zhang <sup>a</sup>, Lin-Ying Shi <sup>a</sup>

<sup>a</sup> College of Chemistry and Chemical Engineering, Henan Polytechnic University, Jiaozuo, Henan 454000, China

<sup>b</sup> State Key Laboratory of Structural Chemistry, Fuzhou, Fujian 350002, China

Corresponding authors' E-mails: iamzd1996@163.com (D. Zhao)

**Table. S1** Rietveld refined crystallographic parameters of the  $\text{NaMg}_{1-x}(\text{PO}_3)_3:x\text{Mn}^{2+}$  samples.

| Formula               | $x = 0.0$   | $x = 0.1$   | $x = 0.2$   | $x = 0.3$   | $x = 0.4$   | $x = 0.5$   |
|-----------------------|-------------|-------------|-------------|-------------|-------------|-------------|
| Crystal system        | Orthorho    | Orthorho    | Orthorho    | Orthorho    | Orthorho    | Orthorho    |
|                       | mbic        | mbic        | mbic        | mbic        | mbic        | mbic        |
| Space group           | <i>Pbca</i> | <i>Pbca</i> | <i>Pbca</i> | <i>Pbca</i> | <i>Pbca</i> | <i>Pbca</i> |
| $a$ (Å)               | 14.267171   | 14.279147   | 14.286875   | 14.304394   | 14.335966   | 14.356815   |
| $b$ (Å)               | 14.221594   | 14.237005   | 14.247443   | 14.261115   | 14.289226   | 14.313797   |
| $c$ (Å)               | 14.224002   | 14.232888   | 14.250390   | 14.266706   | 14.289963   | 14.312203   |
| $V$ (Å <sup>3</sup> ) | 2886.077    | 2893.436    | 2900.687    | 2910.360    | 2927.297    | 2941.166    |
| $2\theta$ (°)         | 5-75        | 5-75        | 5-75        | 5-75        | 5-75        | 5-75        |
| $Z$                   | 16          | 16          | 16          | 16          | 16          | 16          |
| $R_p$ (%)             | 7.48        | 8.80        | 8.45        | 8.28        | 8.12        | 8.84        |
| $R_{wp}$ (%)          | 11.85       | 14.60       | 13.28       | 11.96       | 11.61       | 12.55       |
| $\chi^2$              | 1.882       | 3.582       | 2.712       | 2.261       | 1.823       | 2.224       |

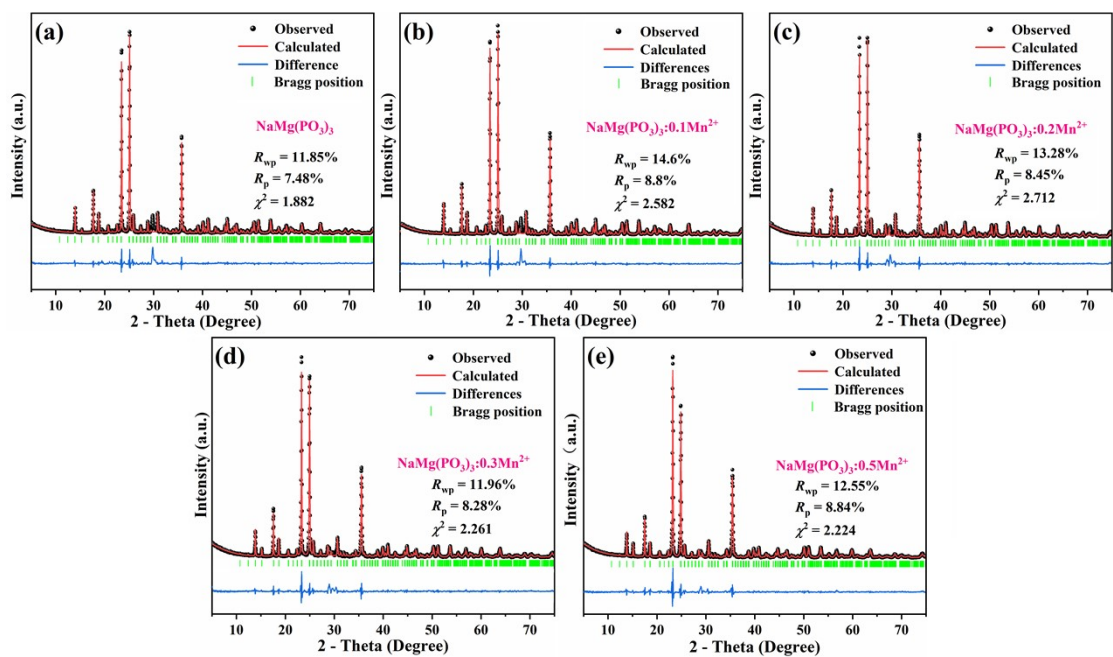

**Figure S1.** Rietveld refinements of the XRD files of NaMg<sub>1-x</sub>(PO<sub>3</sub>)<sub>3</sub>:xMn<sup>2+</sup> ( $x = 0, 0.1, 0.2, 0.3$  and  $0.4$ ).

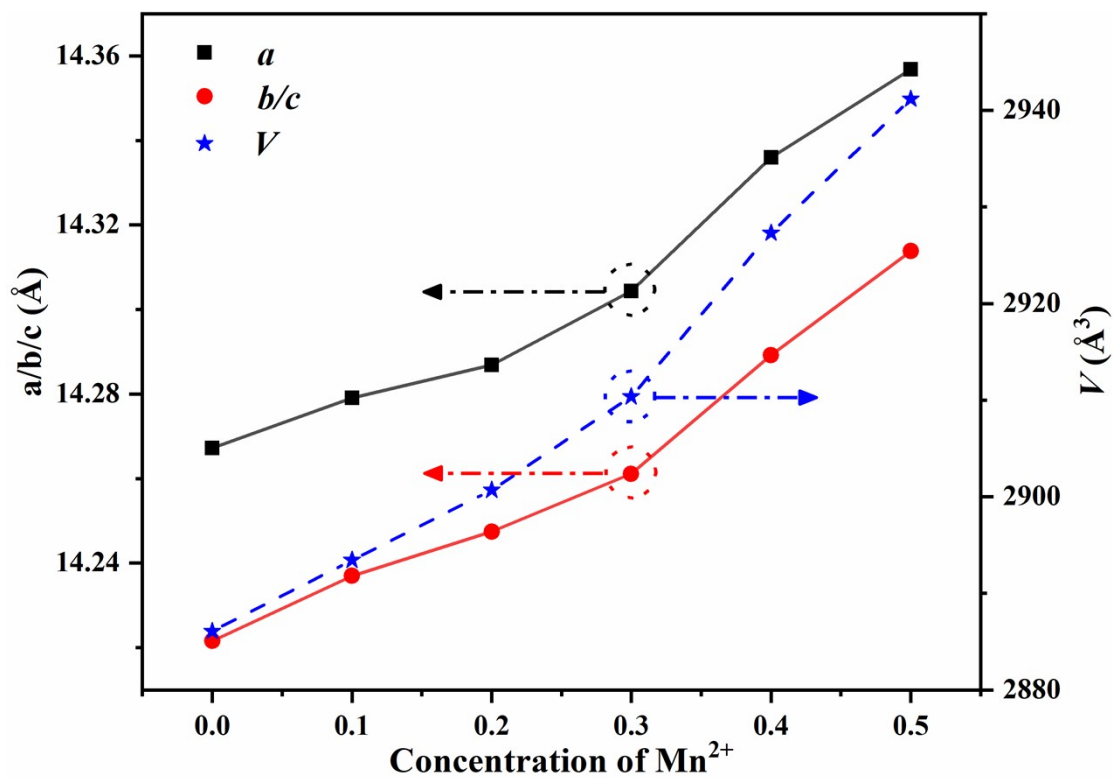

**Figure S2.** Evolution of lattice parameters and the unit cell volumes of NaMg<sub>1-x</sub>(PO<sub>3</sub>)<sub>3</sub>:xMn<sup>2+</sup> ( $x = 0, 0.1, 0.2, 0.3, 0.4$  and  $0.5$ ).

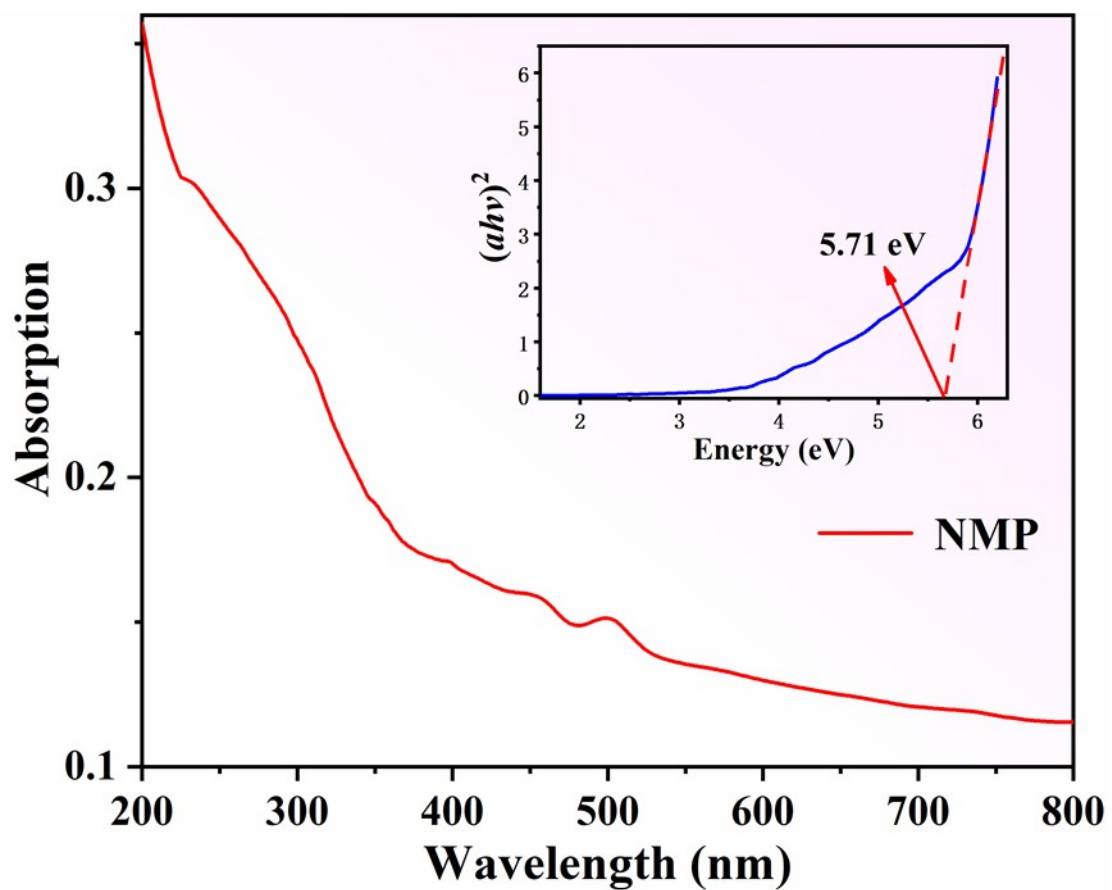

**Figure S3.** Experimental UV-Vis absorption spectrum of NMP ranging from 200 to 800 nm.

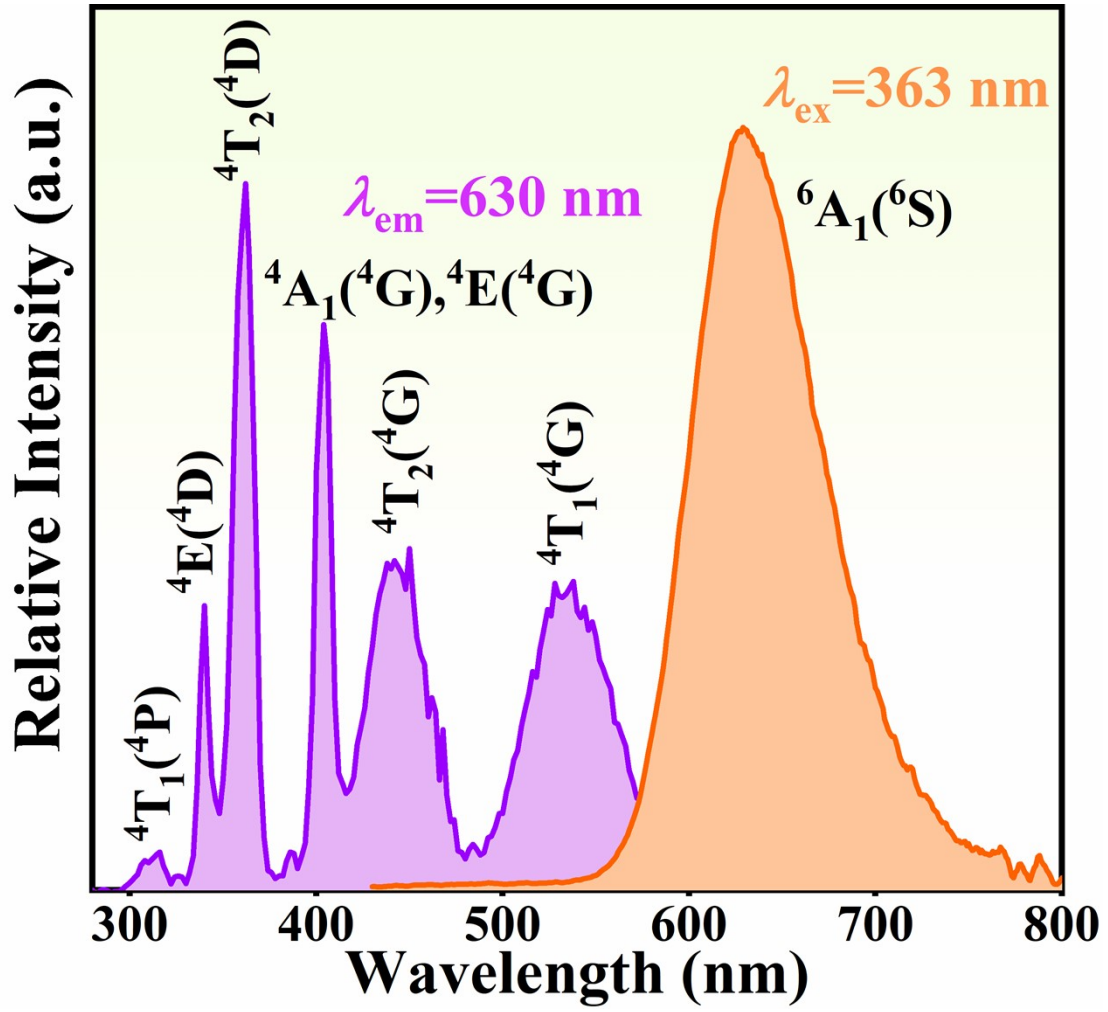

Figure S4. The PLE and PL spectra of NMP:0.2Mn<sup>2+</sup> phosphor.

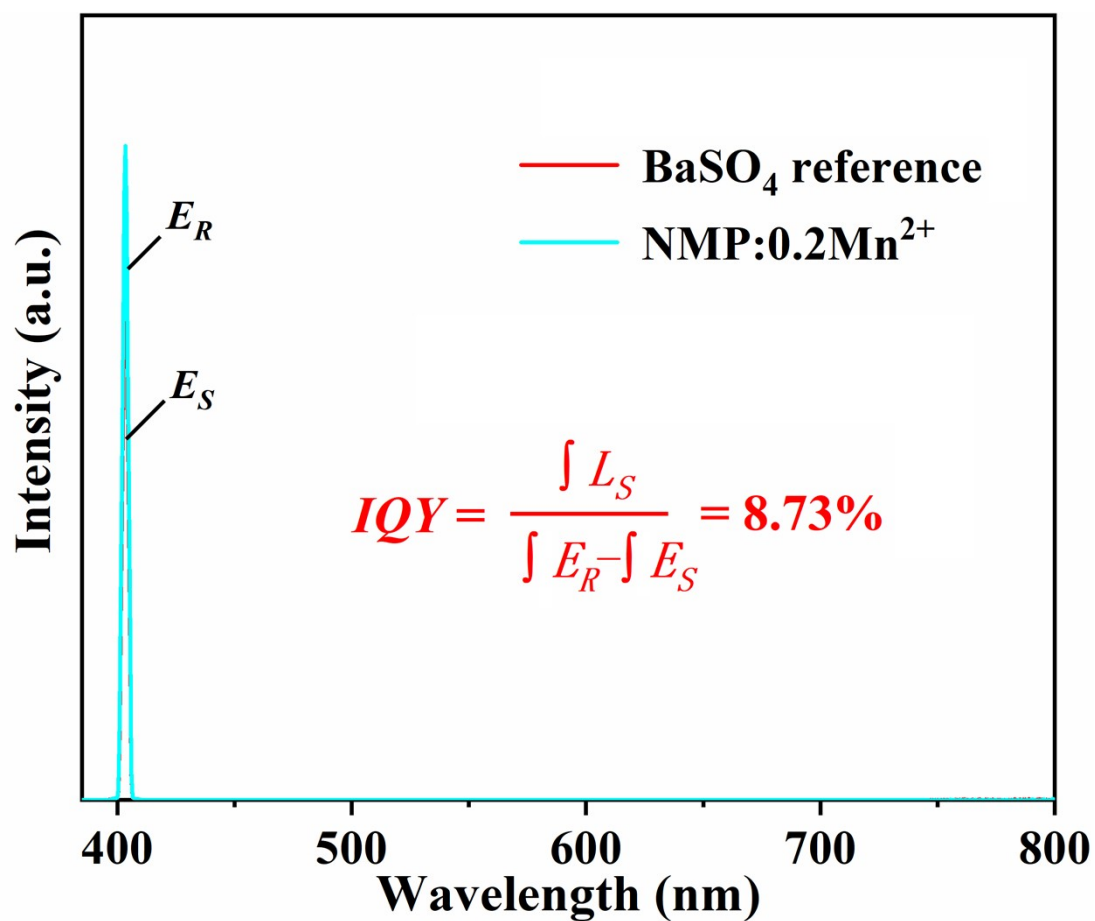

**Figure S5.** Excitation line of BaSO<sub>4</sub> and emission spectrum of NMP:0.2Mn<sup>2+</sup> phosphor collected by using an integrating sphere.

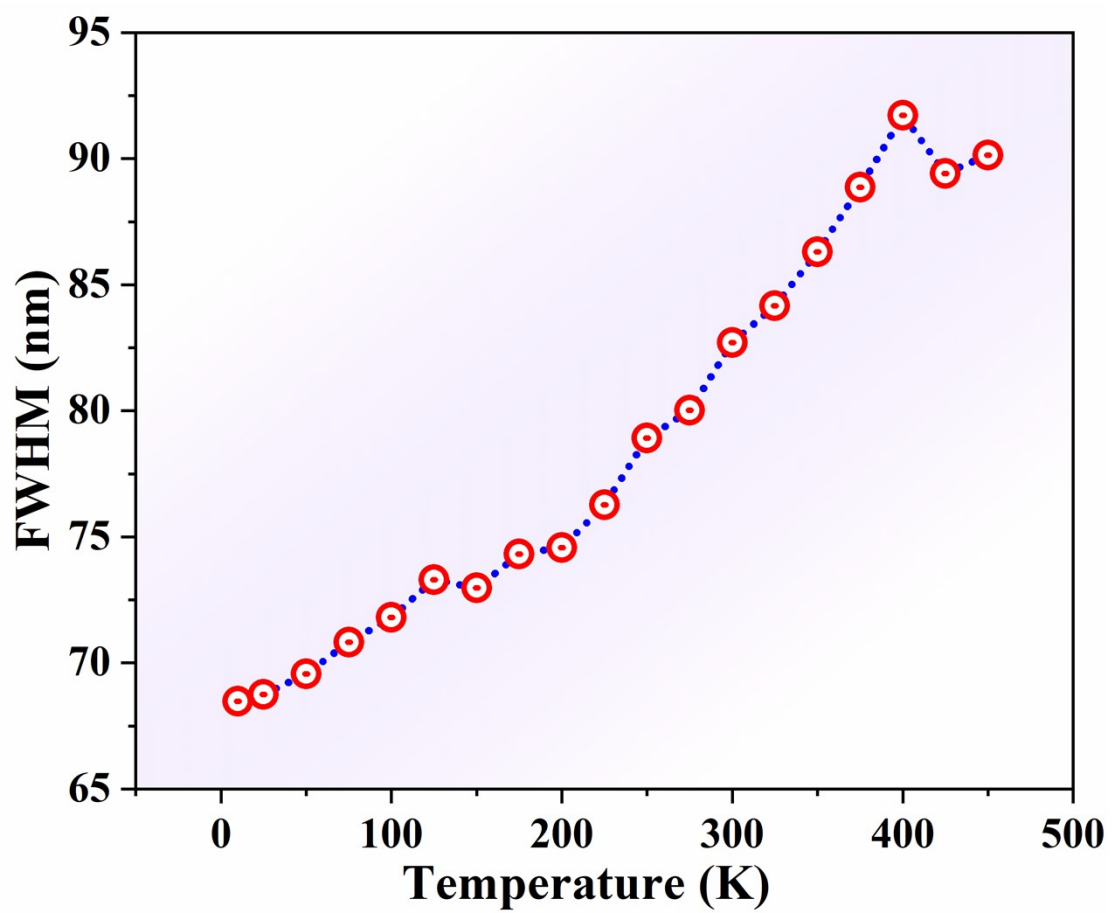

Figure S6. The temperature-dependent FWHM of NMP:0.2Mn<sup>2+</sup>.
